# Supplementary material for: Implementation of MALDI-TOF Mass Spectrometry and Peak Analysis: Application to the Discrimination of Cryptococcus neoformans Species Complex and Their Interspecies Hybrids
Source: MDPI journal article supplement (doi:10.3390/jof6040330), 2020-12-02
Supplement: s1 [file s1]

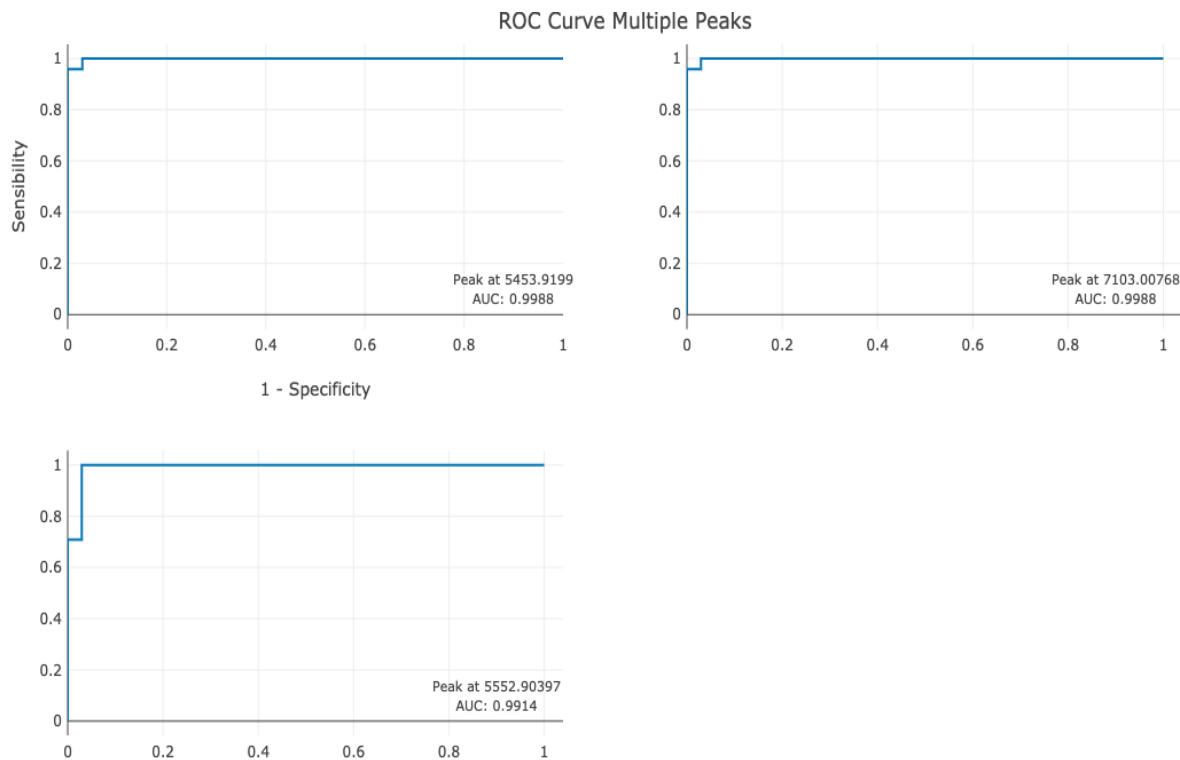

**Figure S1.** ROC Curve of MS peaks of *Cryptococcus spp.* according to the criteria for biomarkers search.

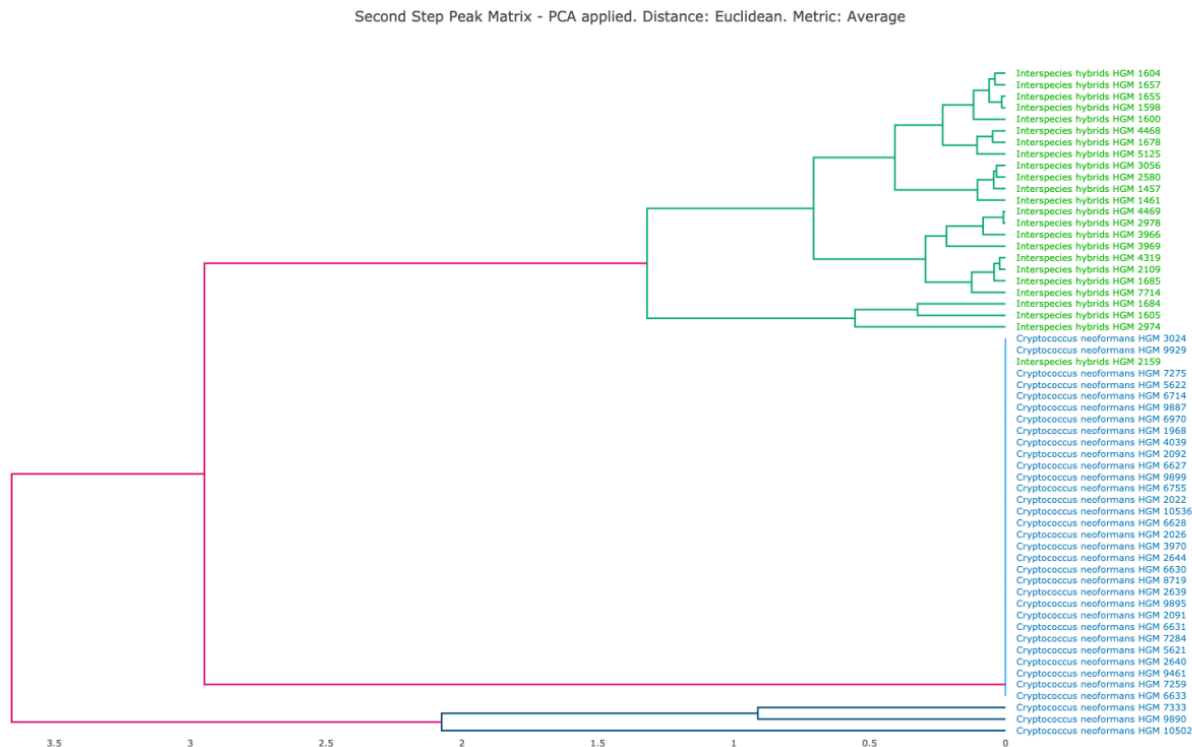

**Figure S2.** Discrimination between *C. neoformans* and the interspecies hybrids using the two-step classification method.

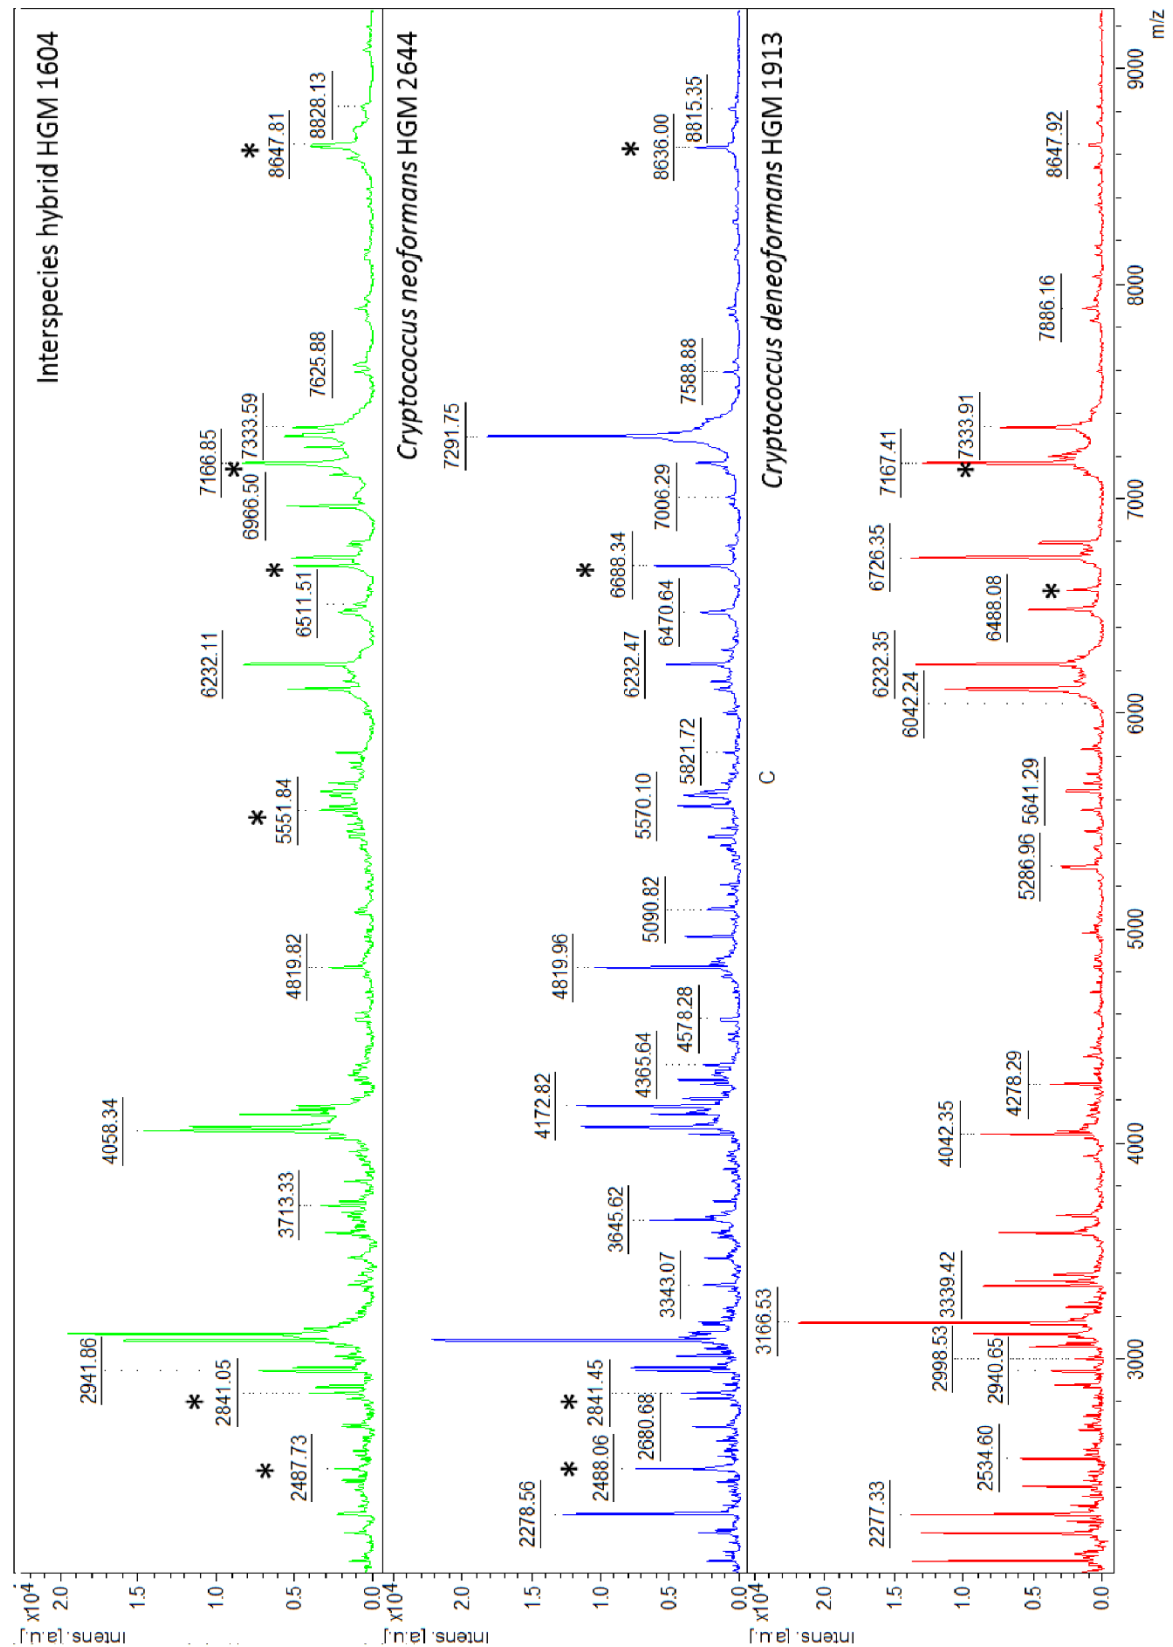

**Figure S3.** Representative protein spectra from the three *Cryptococcus* species analyzed in this study. Species-specific peaks with intensity above 500 arbitrary units (a. u.) are marked with asterisks (\*). The complete list of species-specific peaks can be found in Table 2.
