# Supplementary material for: Implementation of MALDI-TOF Mass Spectrometry and Peak Analysis: Application to the Discrimination of Cryptococcus neoformans Species Complex and Their Interspecies Hybrids
Source: MDPI journal article supplement (doi:10.3390/jof6040330), 2020-12-02
Supplement: s1 [file s1]

| Patient Number | Strain Name | Clinical Sample of isolation | Year | AFLP Genotype | Identification by AFLP | Identification by ITS1-5.8S-ITS2 sequencing |
|----------------|-------------|------------------------------|------|---------------|------------------------|---------------------------------------------|
| 1              | HGM 10502   | Cerebrospinal fluid          | 2007 | 1             | <i>C. neoformans</i>   | <i>C. neoformans</i>                        |
| 2              | HGM 10536   | Cerebrospinal fluid          | 2007 | 1             | <i>C. neoformans</i>   | <i>C. neoformans</i>                        |
| 3              | HGM 2022    | Cerebrospinal fluid          | 1995 | 1             | <i>C. neoformans</i>   | <i>C. neoformans</i>                        |
| 4              | HGM 2026    | Blood                        | 1995 | 1             | <i>C. neoformans</i>   | <i>C. neoformans</i>                        |
| 5              | HGM 2091    | Lung biopsy                  | 1995 | 1             | <i>C. neoformans</i>   | <i>C. neoformans</i>                        |
| 5              | HGM 2092    | Cerebrospinal fluid          | 1995 | 1             | <i>C. neoformans</i>   | <i>C. neoformans</i>                        |
| 6              | HGM 2639    | Blood                        | 1997 | 1             | <i>C. neoformans</i>   | <i>C. neoformans</i>                        |
| 7              | HGM 2640    | Blood                        | 1997 | 1             | <i>C. neoformans</i>   | <i>C. neoformans</i>                        |
| 8              | HGM 2644    | Urine                        | 1997 | 1             | <i>C. neoformans</i>   | <i>C. neoformans</i>                        |
| 9              | HGM 3024    | Cerebrospinal fluid          | 1998 | 1             | <i>C. neoformans</i>   | <i>C. neoformans</i>                        |
| 10             | HGM 4039    | Cerebrospinal fluid          | 1999 | 1             | <i>C. neoformans</i>   | <i>C. neoformans</i>                        |
| 11             | HGM 6627    | Cerebrospinal fluid          | 2003 | 1             | <i>C. neoformans</i>   | <i>C. neoformans</i>                        |
| 12             | HGM 6714    | Lung biopsy                  | 2003 | 1             | <i>C. neoformans</i>   | <i>C. neoformans</i>                        |
| 13             | HGM 6755    | Blood                        | 2003 | 1             | <i>C. neoformans</i>   | <i>C. neoformans</i>                        |
| 14             | HGM 7259    | Cerebrospinal fluid          | 2004 | 1             | <i>C. neoformans</i>   | <i>C. neoformans</i>                        |
| 15             | HGM 7275    | Cerebrospinal fluid          | 2004 | 1             | <i>C. neoformans</i>   | <i>C. neoformans</i>                        |
| 16             | HGM 7284    | Cerebrospinal fluid          | 2004 | 1             | <i>C. neoformans</i>   | <i>C. neoformans</i>                        |
| 17             | HGM 7333    | Cerebrospinal fluid          | 2004 | 1             | <i>C. neoformans</i>   | <i>C. neoformans</i>                        |
| 18             | HGM 8719    | Cerebrospinal fluid          | 2005 | 1             | <i>C. neoformans</i>   | <i>C. neoformans</i>                        |
| 19             | HGM 10916   | Blood                        | 2007 | 2             | <i>C. deneoformans</i> | <i>C. deneoformans</i>                      |
| 20             | HGM 1459    | Cerebrospinal fluid          | 1994 | 2             | <i>C. deneoformans</i> | <i>C. deneoformans</i>                      |
| 21             | HGM 1888    | Cerebrospinal fluid          | 1995 | 2             | <i>C. deneoformans</i> | <i>C. deneoformans</i>                      |
| 22             | HGM 1913    | Bronchoalveolar lavage       | 1995 | 2             | <i>C. deneoformans</i> | <i>C. deneoformans</i>                      |
| 23             | HGM 1972    | Blood                        | 1995 | 2             | <i>C. deneoformans</i> | <i>C. deneoformans</i>                      |
| 24             | HGM 2143    | Cerebrospinal fluid          | 1996 | 2             | <i>C. deneoformans</i> | <i>C. deneoformans</i>                      |
| 25             | HGM 4760    | Cerebrospinal fluid          | 2001 | 2             | <i>C. deneoformans</i> | <i>C. deneoformans</i>                      |
| 26             | HGM 1457    | Cerebrospinal fluid          | 1994 | 3             | Interspecies hybrid    | <i>C. deneoformans</i>                      |
| 27             | HGM 1461    | Blood                        | 1994 | 3             | Interspecies hybrid    | <i>C. deneoformans</i>                      |
| 28             | HGM 1598    | Blood                        | 1994 | 3             | Interspecies hybrid    | <i>C. deneoformans</i>                      |
| 29             | HGM 1600    | Bone marrow                  | 1994 | 3             | Interspecies hybrid    | <i>C. deneoformans</i>                      |
| 30             | HGM 1604    | Blood                        | 1994 | 3             | Interspecies hybrid    | <i>C. deneoformans</i>                      |
| 30             | HGM 1605    | Cerebrospinal fluid          | 1994 | 3             | Interspecies hybrid    | <i>C. deneoformans</i>                      |

|    |          |                     |      |    |                      |                        |
|----|----------|---------------------|------|----|----------------------|------------------------|
| 31 | HGM 1655 | Cerebrospinal fluid | 1995 | 3  | Interspecies hybrid  | <i>C. deneoformans</i> |
| 32 | HGM 1657 | Cerebrospinal fluid | 1995 | 3  | Interspecies hybrid  | <i>C. deneoformans</i> |
| 33 | HGM 1678 | Cerebrospinal fluid | 1995 | 3  | Interspecies hybrid  | <i>C. deneoformans</i> |
| 34 | HGM 1684 | Cerebrospinal fluid | 1995 | 3  | Interspecies hybrid  | <i>C. deneoformans</i> |
| 35 | HGM 1685 | Blood               | 1995 | 3  | Interspecies hybrid  | <i>C. deneoformans</i> |
| 36 | HGM 1767 | Cerebrospinal fluid | 1995 | 3  | Interspecies hybrid  | <i>C. deneoformans</i> |
| 37 | HGM 1768 | Blood               | 1995 | 3  | Interspecies hybrid  | <i>C. deneoformans</i> |
| 38 | HGM 1784 | Cerebrospinal fluid | 1995 | 3  | Interspecies hybrid  | <i>C. deneoformans</i> |
| 39 | HGM 2109 | Cerebrospinal fluid | 1995 | 3  | Interspecies hybrid  | <i>C. deneoformans</i> |
| 40 | HGM 2159 | Blood               | 1996 | 3  | Interspecies hybrid  | <i>C. deneoformans</i> |
| 41 | HGM 2456 | Blood               | 1996 | 3  | Interspecies hybrid  | <i>C. deneoformans</i> |
| 42 | HGM 2580 | Cerebrospinal fluid | 1997 | 3  | Interspecies hybrid  | <i>C. deneoformans</i> |
| 43 | HGM 2974 | Cerebrospinal fluid | 1998 | 3  | Interspecies hybrid  | <i>C. deneoformans</i> |
| 44 | HGM 2978 | Blood               | 1998 | 3  | Interspecies hybrid  | <i>C. deneoformans</i> |
| 45 | HGM 3056 | Cerebrospinal fluid | 1998 | 3  | Interspecies hybrid  | <i>C. deneoformans</i> |
| 46 | HGM 3966 | Blood               | 1999 | 3  | Interspecies hybrid  | <i>C. deneoformans</i> |
| 47 | HGM 3969 | Blood               | 1999 | 3  | Interspecies hybrid  | <i>C. deneoformans</i> |
| 48 | HGM 4319 | Blood               | 2000 | 3  | Interspecies hybrid  | <i>C. deneoformans</i> |
| 49 | HGM 4468 | Blood               | 2000 | 3  | Interspecies hybrid  | <i>C. deneoformans</i> |
| 49 | HGM 4469 | Cerebrospinal fluid | 2000 | 3  | Interspecies hybrid  | <i>C. deneoformans</i> |
| 50 | HGM 5125 | Blood               | 2001 | 3  | Interspecies hybrid  | <i>C. deneoformans</i> |
| 51 | HGM 5621 | Cerebrospinal fluid | 2002 | 3  | Interspecies hybrid  | <i>C. deneoformans</i> |
| 52 | HGM 7714 | Cerebrospinal fluid | 2004 | 3  | Interspecies hybrid  | <i>C. deneoformans</i> |
| 53 | HGM 1968 | Blood               | 1995 | 1B | <i>C. neoformans</i> | <i>C. neoformans</i>   |
| 54 | HGM 3970 | Blood               | 1999 | 1B | <i>C. neoformans</i> | <i>C. neoformans</i>   |
| 55 | HGM 5622 | Cerebrospinal fluid | 2002 | 1B | <i>C. neoformans</i> | <i>C. neoformans</i>   |
| 56 | HGM 6628 | Wound               | 2003 | 1B | <i>C. neoformans</i> | <i>C. neoformans</i>   |
| 57 | HGM 6630 | Blood               | 2003 | 1B | <i>C. neoformans</i> | <i>C. neoformans</i>   |
| 58 | HGM 6631 | Wound               | 2003 | 1B | <i>C. neoformans</i> | <i>C. neoformans</i>   |
| 59 | HGM 6633 | Cerebrospinal fluid | 2003 | 1B | <i>C. neoformans</i> | <i>C. neoformans</i>   |
| 60 | HGM 6970 | Cerebrospinal fluid | 2003 | 1B | <i>C. neoformans</i> | <i>C. neoformans</i>   |

|    |          |                        |      |    |                      |                      |
|----|----------|------------------------|------|----|----------------------|----------------------|
| 61 | HGM 9461 | Cerebrospinal fluid    | 2006 | 1B | <i>C. neoformans</i> | <i>C. neoformans</i> |
| 62 | HGM 9887 | Bronchoalveolar lavage | 2007 | 1B | <i>C. neoformans</i> | <i>C. neoformans</i> |
| 63 | HGM 9890 | Bronchoaspirate        | 2007 | 1B | <i>C. neoformans</i> | <i>C. neoformans</i> |
| 64 | HGM 9895 | Sputum                 | 2007 | 1B | <i>C. neoformans</i> | <i>C. neoformans</i> |
| 65 | HGM 9899 | Bronchoaspirate        | 2007 | 1B | <i>C. neoformans</i> | <i>C. neoformans</i> |
| 66 | HGM 9901 | Blood                  | 2007 | 1B | <i>C. neoformans</i> | <i>C. neoformans</i> |
| 67 | HGM 9929 | Sputum                 | 2007 | 1B | <i>C. neoformans</i> | <i>C. neoformans</i> |

**Table S1.** Detailed information about the *Cryptococcus* strains included in this study.

|                      |                                                                                                                                               |
|----------------------|-----------------------------------------------------------------------------------------------------------------------------------------------|
| Baseline Subtraction | Tophat filter<br>Factor: 0.02                                                                                                                 |
| Noise Reduction      | Savitzky-Golay filter<br>-Window length: 11<br>-Polynomial order: 3                                                                           |
| Alignment            | Allowed shift: Medium<br>Mass tolerance for aligning the spectra:<br>-Linear Mass tolerance: 2000 ppm                                         |
| Peaks Finding        | By threshold<br>-Peak threshold: 0.01<br>-Constant Mass tolerance: 0.5Da<br>-Linear Mass tolerance: 2000ppm<br>-Analysis Data: Peak intensity |

**Table S2.** Pre-treatment of raw data spectra for the biomarkers search.

|                      |                                                                                                             |
|----------------------|-------------------------------------------------------------------------------------------------------------|
| Baseline Subtraction | Tophat filter<br>Factor: 0.02                                                                               |
| Noise Reduction      | Savitzky-Golay filter<br>-Window length: 11<br>-Polynomial order: 3                                         |
| Alignment            | Allowed shift: Medium<br>Mass tolerance for aligning the spectra:<br>-Linear Mass tolerance: 2000 ppm       |
| Peaks Finding        | By mass position<br>-Constant Mass tolerance: 0.5Da<br>-Linear Mass tolerance: 2000ppm                      |
| Merge                | Mass tolerance for aligning the peaks<br>- Constant Mass tolerance: 1Da<br>- Linear Mass tolerance: 2000ppm |
| Normalization        | -Total Ion Count (TIC)                                                                                      |

**Table S3.** Parameters applied for the construction of the peak matrix.

A

Score: 100 % 0

PC 0 (44.73%)

| Actual / Predicted | Deneoformans | Hybrid/Neoformans | % Correct |
|--------------------|--------------|-------------------|-----------|
| Deneoformans       | 7            | 0                 | 100 %     |
| Hybrid/Neoformans  | 0            | 58                | 100 %     |
| 100 %              |              |                   | 100 %     |

Confusion Matrix

k-fold Cross Validation

10-fold cross validation 0

| Actual / Predicted | Deneoformans | Hybrid/Neoformans | % Correct |
|--------------------|--------------|-------------------|-----------|
| Deneoformans       | 7            | 0                 | 100 %     |
| Hybrid/Neoformans  | 0            | 58                | 100 %     |
| 100 %              |              |                   | 100 %     |

Confusion Matrix

Score: 98.46 %

| From / to            | Deneoformans | Interspecies hybrids | Neoformans | % Correct |
|----------------------|--------------|----------------------|------------|-----------|
| Deneoformans         | 7            | 0                    | 0          | 100 %     |
| Interspecies hybrids | 0            | 23                   | 1          | 95.83 %   |
| Neoformans           | 0            | 0                    | 34         | 100 %     |
| 98.46 %              |              |                      |            |           |

Confusion Matrix

k-fold Cross Validation

10-fold cross validation

| From / to            | Deneoformans | Interspecies hybrids | Neoformans | % Correct |
|----------------------|--------------|----------------------|------------|-----------|
| Deneoformans         | 6            | 1                    | 0          | 85.71 %   |
| Interspecies hybrids | 0            | 23                   | 1          | 95.83 %   |
| Neoformans           | 0            | 0                    | 34         | 100 %     |
| 96.92 %              |              |                      |            |           |

Confusion Matrix

**Table S4.** Score and validation of the SVM analysis applied to (A) the two-step model with 5 biomarkers and (B) the one-step model with 5 biomarkers. K=10
